# Supplementary material
Source: PubMed Central journal article supplement (PMC4479056)
Supplement: 97320630011196S1.pdf [file 97320630011196S1.pdf]

## Supplementary material:

Supplementary Figure 1: 2D structures of Tulsi phytochemicals with positive controls used for docking studies

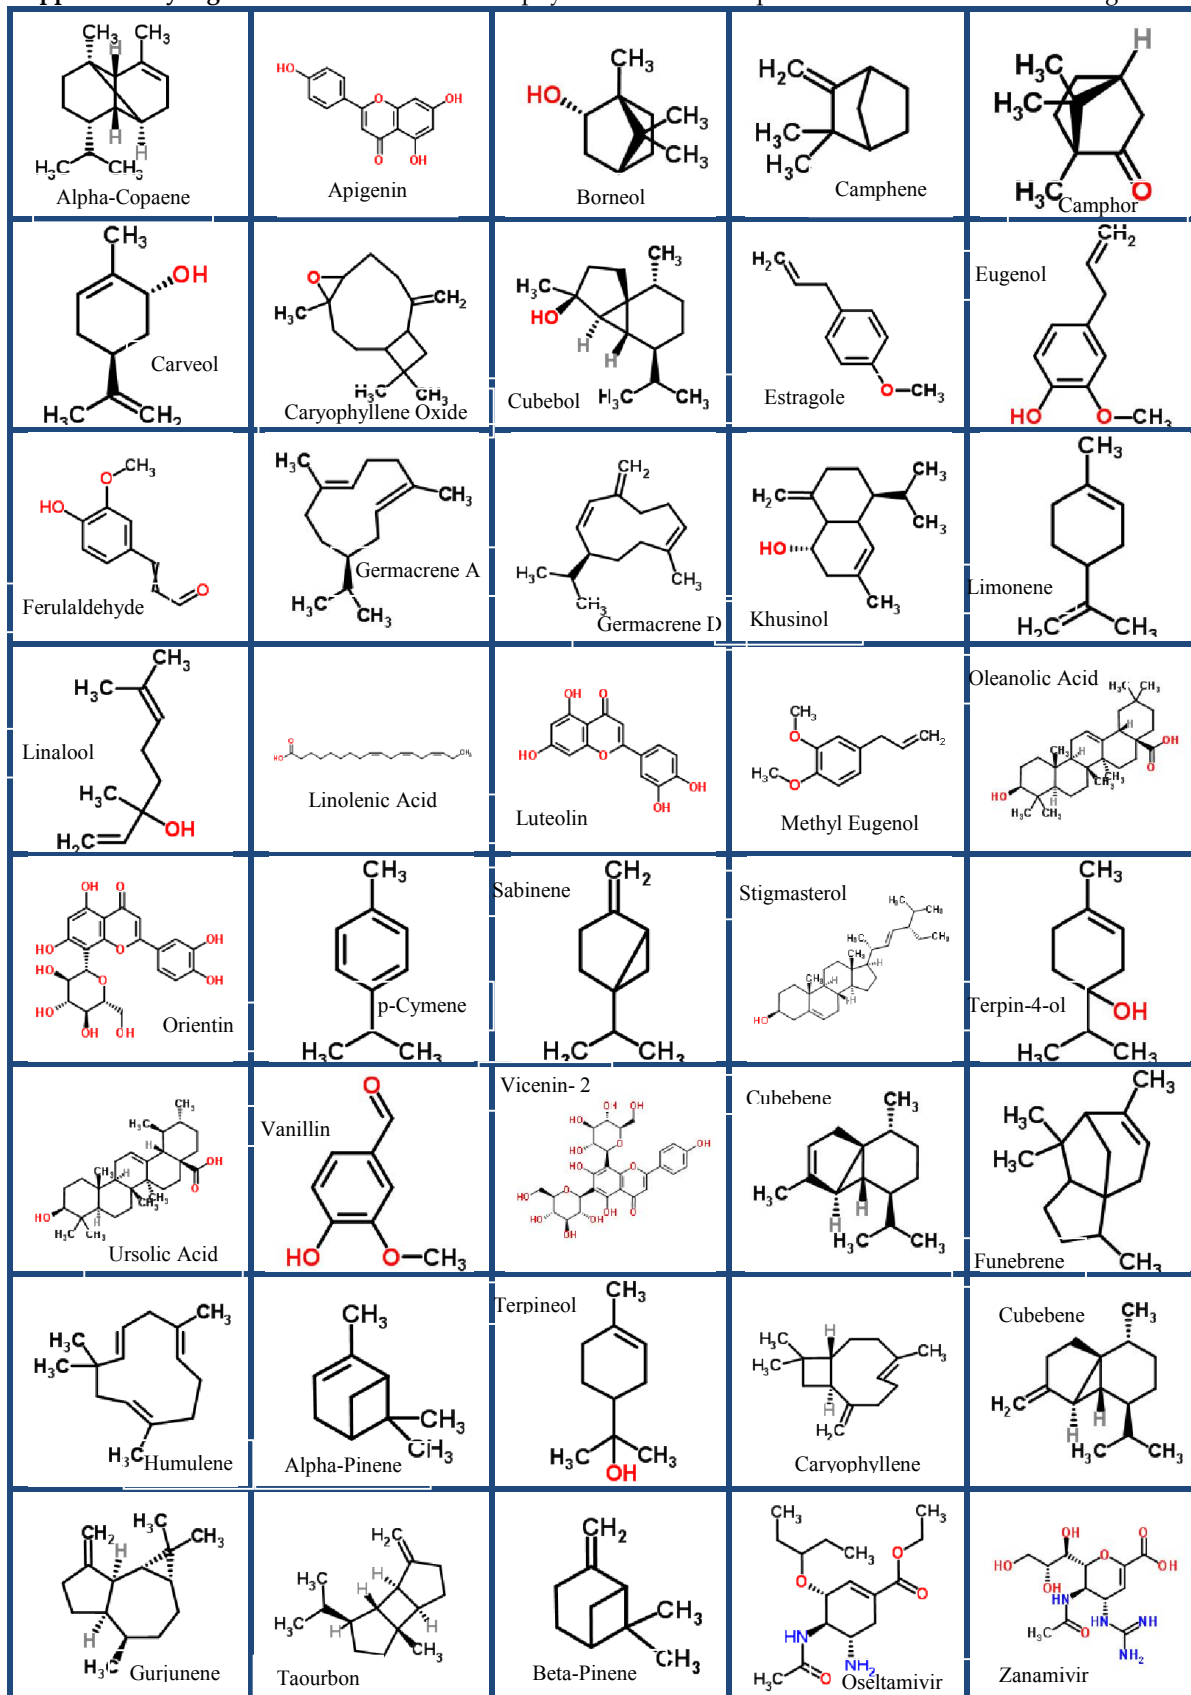

**Table 1:** H1N1 viral proteins used as a target in the docking study with their predicted active site

| Proteins (PDB ID) | Active Binding site x, y, z, (Å) |
|-------------------|----------------------------------|
| 1NCA              | 45.365, 40.588, 91.756           |
| 1NN2              | 93.068, 92.246, 64.287           |
| 2HU4              | 90.787, 92.589, 67.105           |
| 3CL2              | -0.710, 81.087, 110.973          |
| 3B7E              | -28.162, 12.483, -21.650         |
| 3CKZ              | -31.559, -56.920, 7.650          |
| 3AL4              | -33.295, -56.355, 8.472          |
| 3LZG              | -124.334, -39.675, 27.607        |

**Table 2:** Apigenin showed the highest binding energies among all the selected phytochemicals with comparison to Oseltamivir and Zanamivir control compounds while docking with Influenza viral proteins such as (PDB ID) A) 1NCA, B) 1NN2, C) 2HU4, D) 3CL2, E) 3B7E, F) 3CKZ, are Neuraminidase proteins, G) 3AL4 and H) 3LZG are Hemagglutinin proteins based on their rank (kcal/mol).

| Ligands        | H1N1 Viral Proteins               |      |      |      |      |      |                       |      |
|----------------|-----------------------------------|------|------|------|------|------|-----------------------|------|
|                | Neuraminidase Protein (Hydrolase) |      |      |      |      |      | Hemagglutinin Protein |      |
|                | 1NCA                              | 1NN2 | 2HU4 | 3CL2 | 3B7E | 3CKZ | 3AL4                  | 3LZG |
| Apigenin       | -7.7                              | -8.5 | -8.8 | -7.9 | -7.8 | -8.5 | -8.6                  | -7.7 |
| Oleanolic acid | -7.8                              | -8.5 | -8.8 | -8   | -8.7 | -8.5 | -8.7                  | -8.4 |
| Vicenin- 2     | -7.6                              | -8.1 | -8.7 | -7.7 | -8.1 | -8.1 | -8.2                  | -8.7 |
| Stigmasterol   | -6.9                              | -7.6 | -8.1 | -7.9 | -7.7 | -8   | -8.2                  | -7.6 |
| Ursolic Acid   | -7.7                              | -8.6 | -8.5 | -7.6 | -7.5 | -8.5 | -8.7                  | -7.5 |
| Oseltamivir    | -5.3                              | -6.3 | -6.7 | -6.4 | -5.9 | -6.6 | -6.7                  | -6.5 |
| Zanamivir      | -5.8                              | -7.1 | -7   | -6.6 | -6.5 | -7.8 | -7.6                  | -7.7 |

**Table 3:** Molinspiratin web server was used to calculate Lipinski's rule of five drug-likeness properties of potential compounds. Apigenin and Oseltamivir didn't violated Lipinski's rule of five for druglikeness properties, whereas the remain five ligands including Zanamivir was violated Lipinski's rule.

| Ligands        | LogP   | TPSA    | MW      | nOH | nOHNH | Volume  | nViolations |
|----------------|--------|---------|---------|-----|-------|---------|-------------|
| Oleanolic acid | 6.725  | 57.527  | 456.711 | 3   | 2     | 471.139 | 1           |
| Vicenin- 2     | -2.102 | 271.187 | 594.522 | 15  | 11    | 486.357 | 3           |
| Stigmasterol   | 7.869  | 20.228  | 412.702 | 1   | 1     | 450.33  | 1           |
| Ursolic Acid   | 6.789  | 57.527  | 456.711 | 3   | 2     | 471.489 | 1           |
| Apigenin       | 2.463  | 90.895  | 270.24  | 5   | 3     | 224.049 | 0           |
| Oseltamivir    | 0.852  | 90.66   | 312.41  | 6   | 3     | 309.599 | 0           |
| Zanamivir      | -3.642 | 200.725 | 332.313 | 11  | 9     | 283.974 | 3           |

**Abbreviations:** LogP, lipophilic efficiency; TPSA, topological polar surface area; MW, molecular weight; n ON, hydrogen bond acceptor; n OHNH, number of hydrogen bond donor; Volume, 3D molecular geometry of ligand; and n violations, number of Lipinski's rule of five violations.

**Table 4:** ADMET properties of Apigenin, Oseltamivir, and Zanamivir predicted from admetSAR and Toxtree software. Apigenin showed better BBB, HIA and Caco-2 permeability as compared to Oseltamivir and Zanamivir. Whereas the remaining parameters, Apigenin showed almost similar to Oseltamivir and Zanamivir.

| ADMET            | Apigenin | Oseltamivir | Zanamivir |
|------------------|----------|-------------|-----------|
| BBB              | +        | -           | -         |
| HIA              | +        | +           | -         |
| Caco-2 permeable | +        | -           | -         |

|                                                     |       |       |      |
|-----------------------------------------------------|-------|-------|------|
| Aqueous solubility                                  | -2.77 | -2.99 | -2   |
| P-gp Substrate                                      | -     | +     | +    |
| P-gp Inhibitor                                      | -     | -     | -    |
| CYP450 2C9                                          | -     | -     | -    |
| CYP450 2D6                                          | -     | -     | -    |
| CYP450 3A4                                          | -     | +     | -    |
| CYP450 1A2                                          | +     | -     | -    |
| CYP450 2C9                                          | +     | -     | -    |
| CYP450 2D6                                          | -     | -     | -    |
| CYP450 2C19                                         | +     | -     | -    |
| CYP450 3A4                                          | +     | -     | -    |
| ROCT                                                | -     | -     | -    |
| HERG-I                                              | Weak  | Weak  | Weak |
| HERG-II                                             | -     | -     | -    |
| Ames Toxicity                                       | -     | -     | -    |
| Negative for genotoxic carcinogenicity              | yes   | yes   | yes  |
| Negative for nongenotoxic carcinogenicity           | yes   | yes   | yes  |
| Potential S.Typhiurium TA 100 mutagen based on QSAR | No    | No    | No   |
| Potential carcinogen based on QSAR                  | No    | No    | No   |

**Abbreviations:** ADMET, absorption, distribution, metabolism, and excretion-toxicity; BBB, blood-brain barrier penetration; HIA, human intestinal absorption; Caco-2, Caco-2 permeability; CYP, cytochrome P; ROCT, renal organic cation transportation; HERG, human ether-a-go-go-related genes inhibition; P-gp, permeability glycoprotein; +, present; -, not present.
